1 **Tsetse blood-meal sources, endosymbionts, and trypanosome infections**  
2 **provide insight into African trypanosomiasis transmission in the Maasai Mara**  
3 **National Reserve, a wildlife-human-livestock interface**

4 **Short title: Tsetse blood-meals/symbionts/trypanosomes in a human-wildlife**  
5 **interface**

6 Edward Edmond Makhulu<sup>1,2</sup>, Jandouwe Villinger<sup>1</sup>✉, Vincent Owino Adunga<sup>2</sup>, Maamun M.

7 Jeneby<sup>1,3</sup>, Edwin Murungi Kimathi<sup>4</sup>, Enock Mararo<sup>1,5</sup>, Joseph Wang'ang'a Oundo<sup>1,6</sup>, Ali

8 Abdulahi Musa<sup>1,7</sup>, Lillian Wambua<sup>1,6\*#</sup>✉

9 1. International Centre of Insect Physiology and Ecology (*icipe*), P.O. Box 30772-00100,  
10 Nairobi, Kenya

11 2. Biochemistry and Molecular Biology Department, Egerton University, P.O. Box 536,  
12 Egerton, 20115, Kenya

13 3. Institute of Primate Research, National Museums of Kenya, P.O. Box 40658-00100, Nairobi,  
14 Kenya

15 4. Department of Medical Biochemistry, Kisii University, P.O. Box 408-40200, Kisii, Kenya.

16 5. The Roslin Institute, Easter Bush Campus, University of Edinburgh, Midlothian City, EH25  
17 9RG

18 6. School of Biological Sciences, University of Nairobi, P.O. Box 30197-00100, Nairobi,  
19 Kenya

20 7. Department of Medical Laboratory Sciences, Kenyatta University, P.O. Box 43844-00100,  
21 Nairobi, Kenya

22 \*Corresponding author: Lillian Wambua ([wambua.lillian@gmail.com](mailto:wambua.lillian@gmail.com))

23 •These authors contributed equally

24 Email addresses:

25 EEM: [edwardmakhulu@gmail.com](mailto:edwardmakhulu@gmail.com)

26 JV: [jandouwe@icipe.org](mailto:jandouwe@icipe.org)

27 EM: [enockmararo@gmail.com](mailto:enockmararo@gmail.com)

28 JWO: [joseoundo@gmail.com](mailto:joseoundo@gmail.com)

29 AAM: [ali.musa320@gmail.com](mailto:ali.musa320@gmail.com)

30 EMK: [eddkim@gmail.com](mailto:eddkim@gmail.com)

31 VOA: [vowino@gmail.com](mailto:vowino@gmail.com)

32 MJ: [majeneby@primateresearch.org](mailto:majeneby@primateresearch.org)

33 # Current address: International Livestock Research Institute, P.O Box 30709 – 00100, Nairobi,  
34 Kenya

## 35 **Abstract**

36 **Background:** African trypanosomiasis (AT) is a neglected disease of both humans and animals  
37 caused by *Trypanosoma* parasites, which are transmitted by obligate hematophagous tsetse flies  
38 (*Glossina* spp.). Understanding of AT transmission is hampered by limited knowledge on  
39 interactions of tsetse flies with their vertebrate hosts and the influence of endosymbionts on  
40 vector competence, especially in wildlife-human-livestock interfaces. We identified the tsetse  
41 species, their blood-meal sources, and the correlation between endosymbiont and trypanosome  
42 infection status in the trypanosome-endemic Maasai Mara National Reserve (MMNR) of Kenya.

43 **Methodology/Principal Findings:** Among 1167 tsetse flies (1136 *Glossina pallidipes*, 31  
44 *Glossina swynnertoni*) collected from 10 sampling sites, 28 (2.4%) were positive by PCR for  
45 trypanosomes, majority (17/28) being *Trypanosoma vivax*. Blood-meal analyses based on high-  
46 resolution melting analysis of mitochondrial cytochrome c oxidase 1 and cytochrome b gene  
47 PCR products (n = 345) identified humans as the most common vertebrate host (37%), followed  
48 by hippopotamus (29.1%), African buffalo (26.3%), elephant (3.39%) , and giraffe (0.84%).  
49 Trypanosome-infected flies had fed on hippopotamus and buffalo. Additionally, PCR analysis  
50 revealed that tsetse flies were more likely to be infected with trypanosomes if they were infected  
51 with the *Sodalis glossinidius* endosymbiont (P = 0.0022 Fisher's exact test).

52 **Conclusions/Significance:** Diverse species of wildlife hosts may contribute to the maintenance  
53 of tsetse populations and/or persistent circulation of African trypanosomes in the MMNR.  
54 Although the African buffalo is known to be a key reservoir of AT, the higher proportion of  
55 hippopotamus blood-meals in trypanosomes-infected flies identified here indicates that other  
56 wildlife species may also be important to transmission cycles. No trypanosomes associated with  
57 human disease were identified, but the high proportion of human blood-meals identified are  
58 indicative of human African trypanosomiasis transmission risk. Furthermore, this work provides  
59 data showing that *Sodalis* endosymbionts can be associated with increased trypanosome infection  
60 rates in endemic ecologies.

## 61 **Author summary**

62 Human and animal African trypanosomiasis are neglected tropical diseases with potential to  
63 spread to new areas. Wild animals are important reservoirs for African trypanosomes and crucial  
64 in the emergence and re-emergence of AT. Vertebrate host-vector-parasite interactions are  
65 integral to trypanosome transmission. We investigated the vertebrate blood-meals and

66 trypanosomes-endosymbionts co-infections in tsetse flies, which have been associated with  
67 reservoirs and vector competence, respectively, on AT transmission in Kenya's Maasai Mara  
68 National Reserve. We identified tsetse fly diversity, trypanosome and endosymbiont infection  
69 status, and vertebrate blood-meal hosts to infer potential transmission dynamics. We found  
70 that *Glossina pallidipes* was the major tsetse fly vector and that *Trypanosoma vivax* was the  
71 main trypanosome species circulating in the region. Humans, hippopotamus, and buffalo were  
72 the most frequented for blood-meals. Buffalo and hippopotamus blood-meals were identified in  
73 trypanosome infected flies. Feeding of the flies on both humans and wildlife may potentiate the  
74 risk of the human trypanosomiasis in this ecology. Additionally, we found that the  
75 endosymbiont *Sodalis glossinidius* is associated with higher trypanosome infection rates in wild  
76 tsetse flies. These findings emphasize the importance of understanding the interaction of tsetse  
77 flies with vertebrate blood-meal sources and their endosymbionts in the transmission and control  
78 of AT.

## 79 **Introduction**

80 African trypanosomes (genus *Trypanosoma*), cyclically transmitted by the tsetse fly vector  
81 (genus *Glossina*), cause a group of diseases known as African trypanosomiasis (AT). In man, the  
82 disease is called sleeping sickness (human African trypanosomiasis, HAT), while in animals it is  
83 called nagana (African animal trypanosomiasis, AAT). African trypanosomiasis is endemic in 37  
84 countries in Africa, in regions inhabited by the insect vector. Approximately 70 million people  
85 and 60 million cattle in AT endemic regions are at risk of infection [1,2]. Consequently, reduced  
86 productivity due to chronic disease in humans animal and loss of livestock through death,  
87 particularly in regions where pastoralism is the main economic activity threatens food security,

88 quality of living, and economic stability [3,4]. Therefore, more effective control and  
89 management strategies of AT are required.

90 Control of AT has involved combinations of active surveillance, vector control strategies,  
91 and mass chemotherapy [5]. Notably, chemotherapy has been limited by increasing levels of  
92 resistance to the available trypanocides, chemotoxicity, and unavailability of new drugs [5,6]. To  
93 address limitations associated with chemotherapy, transmission disruption through vector control  
94 is crucial. Vector control is largely applied in areas where livestock are kept [7,8]. However,  
95 wild animals sustain the life cycles of tsetse flies [9,10] and the parasites they transmit [11,12],  
96 and are thus an important factor of transmission dynamics of AT, particularly in wildlife  
97 ecologies. Tsetse fly blood-meal sources are highly variable, especially in wildlife areas. Hence,  
98 one sampling area cannot be used to make a generalized conclusion of tsetse feeding behavior  
99 [12]. Consequently, identification of tsetse fly host blood-meal sources in specific regions can  
100 help elucidate potential wild animals involved in AT transmission and provide baseline for  
101 research towards improving vector-control strategies, particularly in wildlife-human-livestock  
102 interfaces that serve as hotspots for the emergence and re-emergence of AT.

103 Moreover, transmission of trypanosomes from an infected animal to another by tsetse  
104 flies is highly influenced by vector competence – the vector’s ability to successfully acquire and  
105 transmit a pathogen. Competence is influenced by various factors including genotype, sex,  
106 species, immune status, and endosymbionts, [13–17]. Endosymbionts have been shown to  
107 influence the susceptibility of tsetse flies to trypanosomes [18]. *Wigglesworthia glossinidia*,  
108 *Sodalis glossinidius*, and *Wolbachia pipentis* are well-defined tsetse fly endosymbionts with  
109 direct and indirect effects on the tsetse fly vectorial capacity [19]. Despite numerous studies on

110 the influence of endosymbionts on vectorial competence [13,14,20–22], studies on the presence  
111 and influence of tsetse fly endosymbionts in wildlife-livestock-human interfaces are scant.

112 The Maasai Mara National Reserve (MMNR) is a prime tourist destination in Kenya that  
113 is surrounded by a number of ranches and is thus characterized by constant interactions between  
114 wildlife and humans and their livestock. With endemic tsetse fly populations, there have been  
115 recent cases of tourists contracting HAT in the MMNR [23,24]. Therefore, the MMNR is an  
116 ideal study site for investigating the contribution of tsetse fly blood-meal sources and the major  
117 endosymbionts of tsetse flies in relation to transmission of African trypanosomes in a human-  
118 livestock-wildlife interface. We sought to understand the interactions occurring among natural  
119 tsetse fly populations, trypanosome species, endosymbionts, and vertebrate hosts in the MMNR.  
120 Specifically, we investigated the diversity of tsetse fly species and their trypanosome species,  
121 vertebrate blood-meal sources, and *Sodalis*, *Wolbachia*, and salivary gland hypertrophy virus  
122 (SVGH) endosymbionts.

## 123 **Materials and methods**

### 124 **Study area**

125 Field sampling was carried out within the MMNR (1°29'24"S 35°8'38"E, 1500 m above sea  
126 level) located in southwest region of Kenya, which is contiguous with the Serengeti National  
127 Park (SNP) in Tanzania (Figure 1). This sampling site is located approximately 150 km south  
128 from the equator and covers an area of 1500 km<sup>2</sup>. The MMNR is home to a diverse variety of  
129 flora and fauna, and is famously known for its wild animals and ‘Great Migration’ of  
130 wildebeests, zebras, and antelopes across the Mara River. Grassland forms the major vegetation  
131 cover in this ecosystem, with swampy grounds found around the riverbanks. The sampling sites  
132 were selected along the rivers due to their high populations of animals (Figure 1). Ethical

133 clearance for this research in protected areas was sought from and approved by the Kenya  
134 Wildlife Service (KWS) Research Authorization committee.

135 **Fig 1. Map showing tsetse fly sampling sites from Maasai Mara National Reserve and**  
136 **number of tsetse species sampled.** Each sampling site has its total sampled flies indicated in the  
137 pie chart.

### 138 **Tsetse collection and identification**

139 Tsetse flies were trapped at the start of the annual wildebeest migration between June and July  
140 2016 using Nguruman (Ngu) traps baited with acetone and cow urine. Traps were set in the  
141 morning (10 - 11 am) at different sampling sites in the various regions demarcated by Mara,  
142 Talek, and Sand Rivers, and at the wildlife crossing points across the Mara River at the border of  
143 Kenya and Tanzania's SNP (Figure 1). The traps were emptied after 24 hours, and trapped flies  
144 were transferred into 50-mL falcon tubes and stored in dry ice before transportation in liquid  
145 nitrogen to the laboratory at the International Centre of Insect Physiology and Ecology (*icipe*),  
146 Nairobi where they were sorted. The flies were identified to species level under a light  
147 microscope (Stemi 2000-C, Zeiss, Oberkochen, Germany) based on standard published  
148 taxonomic keys [25].

### 149 **Nucleic acid extraction**

150 Individual flies (after removal of legs and wings) were homogenized using six 2-mm zirconium  
151 beads in 1.5-ml microcentrifuge tubes using Mini-beadbeater-16 (BioSpecs Inc., Bartlesville,  
152 OK, USA) for 20 seconds. DNA was extracted from the homogenate of each sample using the  
153 ammonium acetate protein precipitation method described by Adams *et al.* [26], with slight  
154 modifications. Briefly, 300 µl of cell lysate buffer (10 mM Tris-HCl, pH 8.0, 0.5% SDS and 5  
155 mM EDTA) was added into homogenized samples and incubated for 90 minutes at 65°C.

156 Thereafter, 100  $\mu$ l of protein precipitate solution (8M ammonium acetate and 1M EDTA) was  
157 added to each mixture, which were vortexed for 30 seconds, incubated in ice for 30 minutes, and  
158 centrifuged at 14,000 x g for 15 minutes at 4°C. The supernatants were transferred into new 1.5-  
159 ml microcentrifuge tubes containing 300  $\mu$ l of isopropanol, and mixed gently by inverting 100  
160 times and centrifuging at 14,000 x g for 30 minutes. The supernatants were pipetted off and  
161 subsequently, 300  $\mu$ l of ice-cold 70% molecular grade ethanol was added to each pellet, gently  
162 mixed by inversion and centrifuged at 14,000 x g for 30 minutes. Ethanol was pipetted off and  
163 the pellets were air-dried overnight. The DNA pellets were solubilized by adding 100  $\mu$ l of PCR  
164 grade water and quantified using a NanoDrop™ 2000 Spectrophotometer (Thermo Scientific,  
165 NJ, USA). Concentrations were adjusted to 50 ng/ $\mu$ l using PCR grade water.

#### 166 **PCR identification of African trypanosomes**

167 Trypanosome infections in flies were detected using trypanosome-specific ITS1 CF and BR  
168 primers (S1 Table) as described by Njiru *et al.* [27]. *Trypanozoon* species were further resolved  
169 using species-specific primers (S1 Table). Briefly, glycosylphosphatidylinositol-phospholipase C  
170 polypeptide (GPI-PLC) and serum resistant-associated (SRA) species-specific primers were used  
171 to identify *T. brucei brucei* and *T. brucei rhodesiense*, respectively, by PCR [28]. *Trypanosoma*  
172 *congolense savannah* was identified according to Masiga *et al.* [29].

173 PCR amplification was carried out in final reaction volumes of 20  $\mu$ l containing 10.4  $\mu$ l of PCR  
174 grade water, 1 $\times$  GeneScript PCR reaction buffer and 1.6 units of Green Taq DNA polymerase  
175 enzyme (GeneScript, New Jersey, USA), 1  $\mu$ l (final concentration 0.5  $\mu$ M) of each primer and  
176 200 ng DNA template. The PCR reactions were performed in a SimpliAmp™ Thermal Cycler  
177 (Applied Biosystems, California, USA) programmed as follows; initial denaturation step at 94°C  
178 for 3 minutes followed by 30 cycles of denaturation at 94°C for 30 seconds, annealing at a



179 temperature specific for each primer (S1 Table) for 30 seconds and extension at 72°C for 45  
180 seconds and a final extension at 72°C for 7 minutes. PCR grade water was used as a negative  
181 control, in place of DNA template. DNA obtained from characterized and archived stocks of  
182 African trypanosome species were used as positive controls. The PCR products were size  
183 separated by ethidium stained agarose gel electrophoresis and viewed under UV light. Gel  
184 images were captured using Genoplex (VWR International GmbH, Darmstadt, Germany) and  
185 images processed using Adobe Photoshop (Adobe Photoshop CC).

### 186 **Host blood-meal identification**

187 Blood-meal sources were determined by PCR coupled with high-resolution melting (HRM)  
188 analysis of vertebrate cytochrome c oxidase subunit I (COI) and cytochrome b (cyt b)  
189 mitochondrial genes as previously described [30–32]. We analyzed 760 flies, representing 65%  
190 of the sampled population, which included all engorged flies (n = 39) and 721 randomly selected  
191 non-engorged flies. Final concentrations of the PCR reactions were performed in 20 µl PCR  
192 reaction volumes, which included 4 ul of 5× Hot FIREPol EvaGreen HRM Mix (Solis BioDyne,  
193 Teaduspargi, Estonia), 0.5 µM of each primer, 250 ng of DNA template, and 10 µl of PCR grade  
194 water. The PCR cycling conditions included an initial denaturation at 95°C for 15 minutes  
195 followed by 35 cycles of denaturation at 95°C for 30 seconds, annealing at specific temperatures  
196 for COI and cyt b primers (S1 Table) for 30 seconds and elongation at 72°C for 30 seconds. This  
197 was followed by a final extension at 72°C for 7 minutes. Thereafter, HRM analysis of PCR  
198 products was conducted as described by [30–32]. HRM profiles were analysed using the Rotor-  
199 Gene Q software v2.1 with normalized regions between 76.0-78.0°C and 89.50-90.0°C.  
200 Amplicons representative of each unique HRM profile were purified using ExoSAP-IT kit (USB  
201 Corporation, Cleveland, Ohio, USA) according to the manufacturer’s instructions and sequenced

202 at Macrogen (South Korea). The sequences were analysed and aligned using the MAFFT plugin  
203 in Geneious software version 11.1.4 [33]. Vertebrate species were confirmed by sequence  
204 alignments with Basic Local Alignment search tool (BLAST) [34] hits obtained from the  
205 GenBank database.

## 206 **PCR identification of *Sodalis glossinidius*, *Wolbachia*, and salivary gland hypertrophy virus**

207 We screened 760 tsetse flies for their endosymbionts, *S. glossinidius*, *Wolbachia*, and salivary  
208 gland hypertrophy virus (SGHV). The PCR reactions were done in 20 µl reaction volumes using  
209 endosymbiont-specific primers (SI table) and similar concentrations of PCR components as those  
210 described above for host blood-meal identification. The PCR cycles steps were the same as those  
211 used in host blood-meal analysis with changes made only in the annealing temperatures, which  
212 were specific for the different primer pairs [35–37]. Positive controls for *Wolbachia* and *Sodalis*  
213 were isolated from *Aedes aegypti* and *Glossina pallidipes*, respectively, while a plasmid standard  
214 from a synthetic construct of the *P74* gene of SGHV from GenScript was used as a positive  
215 control. PCR-grade water used to reconstitute the extracted genomic DNA was used as a  
216 negative control. The amplified products were size separated in 2% (W/V) agarose gels. The  
217 amplicons were visualized, images captured, and processed as previously described.

## 218 **Statistical analysis**

219 Data were processed and analyzed through descriptive statistical tools using RStudio at 95%  
220 confidence levels. Two-tailed t-tests were used to compare variations of tsetse fly species  
221 proportions between the sampling blocks and the mean differences of host blood-meals between  
222 the tsetse fly species. Fisher's exact test was used to determine whether endosymbiont infections  
223 were correlated with trypanosome co-infections.

## 224 Results

### 225 Tsetse fly species identified

226 A total of 1167 tsetse flies were collected from the ten sampling sites, of which 1136 were *G.*  
 227 *pallidipes* and 31 were *G. swynnertoni* (Table 1). The highest number of *G. swynnertoni* flies  
 228 (87.1%; n = 27) were sampled from sites closer to the border between the MMNR and the SNP  
 229 (i.e. Sand River and Mara Bridge sampling sites) as depicted in Fig 1. Female tsetse flies  
 230 constituted 61% of the collected samples, whereas 39% were male. There was no statistical  
 231 difference between the mean sex proportions of *G. pallidipes* (0.963±0.029) and *G. swynnertoni*  
 232 (0.037±0.029) (t (4) = 31.54, p < 0.001).

### 233 Table 1. Numbers and proportions of trypanosome species identified in tsetse fly species.

234 \*The percentage of trypanosomes infecting each tsetse fly species is indicated in brackets.

235

| Tsetse fly species    | Number of tsetse flies screened | Number of tsetse infected with African trypanosomes* |                       |                 | Percent (%) trypanosome infection |
|-----------------------|---------------------------------|------------------------------------------------------|-----------------------|-----------------|-----------------------------------|
|                       |                                 | <i>T. b. brucei</i>                                  | <i>T. c. savannah</i> | <i>T. vivax</i> |                                   |
| <i>G. pallidipes</i>  | 1136                            | 3 (0.3%)                                             | 7 (0.6%)              | 11 (1%)         | 2.1                               |
| <i>G. swynnertoni</i> | 31                              | 1 (3.2%)                                             | 0 (0%)                | 6 (19.4%)       | 12.9                              |
| Totals                | 1167                            | 4 (0.4%)                                             | 7 (0.6%)              | 17 (1.5%)       | 2.4                               |

236

### 237 Trypanosome species identified in sampled tsetse flies

238 Trypanosome DNA was amplified in 28 (2.40%) out of the 1167 tsetse flies sampled (Table 1).  
 239 The African trypanosome species identified were *T. vivax* (17/28), whereas 25% were *T.*  
 240 *congolense savannah* (7/28), and 14.3% were *T. brucei brucei* (4/28) (S3 Table, GenBank  
 241 accessions MK684364-MK684366). A representation of the samples positive for trypanosomes

242 by PCR is shown in S1 Fig. Trypanosome infection rate was higher in *G. swynnertoni* (12.9%, n  
243 = 4/31) than in *G. pallidipes* (2.1%; n=24/1136). There were no mixed trypanosome infections in  
244 either of the fly species.

#### 245 **Tsetse blood-meal sources identified**

246 Vertebrate blood-meals were detected and identified in 46.6% (354/760) of the tsetse flies  
247 analyzed which comprised of 328 *G. pallidipes* and 26 *G. swynnertoni* (Fig. 2; S2 Table). The  
248 most common source of blood-meal was from humans (*Homo sapiens*) (n = 131) (S3 Table,  
249 GenBank accession MK684355, MK684357), followed by hippopotamus (*Hippopotamus*  
250 *amphibious*) (S3 Table, GenBank accession MK684356) (n = 103), African buffalo (*Syncerus*  
251 *caffer*) (S3 Table, GenBank accessions MK684354, MK684358) (n = 93), African savannah  
252 elephant (*Loxodonta africana*) (S3 Table GenBank accession MK684359) (n = 12), and giraffe  
253 (*Giraffa camelopardis*) (S3 Table, GenBank accession MK684360) (n = 3). There were 406  
254 samples that had HRM peaks lower than 0.5 rate in fluorescence (dF/dT), thus qualified as  
255 having a non-detectable blood-meal.

256 **Fig 2. Blood-meal melt curves and proportions of vertebrate species identified.** A. High  
257 resolution melt curves of single species and mixed species blood-meals. Mixed blood-meals  
258 were determined by matching melt profile peaks to those of more than one blood-meal control.  
259 B. Overall blood-meal proportions and proportions per tsetse species.

260 Humans were the most frequently identified blood-meal sources in *G. pallidipes*, whereas  
261 African buffalo was the major blood-meal sources for *G. swynnertoni* (Fig. 2B; S2 Table).  
262 However, there was no significant difference in the mean blood-meal source proportions  
263 between the two tsetse fly species ( $t(4) = 2.47, p = 0.069$ ). We further observed that of the 28  
264 trypanosome-infected tsetse, 14 (10 *G. pallidipes* and four *G. swynnertoni*) had blood-meals

265 from African buffalo, while eight *G. pallidipes* had blood-meals from hippopotamus. The blood-  
266 meal sources for six trypanosome-infected flies could not be identified. The vertebrate blood-  
267 meal detection rates were 94.87% and 43.69% in engorged and non-engorged flies, respectively.

268 Twelve mixed blood-meals were detected (Fig 2), accounting for 3.4% of the positively  
269 identified samples. These samples had distinct melt curves that mapped onto those of known  
270 reference samples. Of these, human and buffalo mixed blood-meals was the most frequent  
271 combination (6/12), followed by human and elephant (3/12), elephant and giraffe (2/12), and  
272 human and hippopotamus (1/12) (Fig 2; S2 Table). Mixed blood-meals were further confirmed  
273 by sequencing of representative PCR-HRM amplicons (S2 Fig).

#### 274 **Co-infection of tsetse with endosymbionts and African trypanosomes**

275 A total of 69 (n = 760, 9.08%) flies (66 *G. pallidipes*, three *G. swynnertoni*) were infected with  
276 the endosymbiont *S. glossinidius* (S3 Table, 16S-23S rRNA GenBank accessions MK684361-  
277 MK684363) (S3 Fig.). Notably, a greater proportion of *S. glossinidius*-positive *G. pallidipes* flies  
278 were co-infected with trypanosomes (7/68, 10.3%) than *G. pallidipes* without *Sodalis* infections  
279 (16/661, 2.42%) (P = 0.0033 Fisher's exact test) (Table 2). Five of the co-infections were with *T.*  
280 *congolense* and two were with *T. vivax*. As only one *G. swynnertoni* fly, which was also  
281 trypanosome infected (*T. vivax*), was positive for *S. glossinidius*, the sample size was too small  
282 for meaningful association analysis in this tsetse species. Nonetheless, across both species, the  
283 proportion of *S. glossinidius* infected flies that were co-infected with trypanosomes (8/69,  
284 11.6%) was similarly significantly higher than in tsetse without the *S. glossinidius* endosymbiont  
285 (20/691, 2.89%) (P = 0.0022, Fisher's exact test).

286           Eighteen flies (n = 760; 2.37%), 16 females and two males (all *G. pallidipes*), were  
287   infected with *Wolbachia* (S3 Table, GenBank accessions MK680053-MK680056) (S3 Fig).  
288   However, there was no statistical significance between *Wolbachia* and trypanosome co-  
289   infections in *G. pallidipes* (P = 0.555, Fisher's exact test). No SGHV was detected in this study  
290   and therefore there were no co-infection studies.

291

**Table 2. Statistical analysis of *Sodalis glossinidus* and *Wolbachia* co-infection with trypanosomes in *G. pallidipes* and *G. swynnertoni*.** Abbreviations: S+/S- *S. glossinidus* positive/negative, W+/W- *Wolbachia* positive/negative, T+/T- trypanosome positive/negative.

|                              | <i>G. pallidipes</i> |              | <i>G. swynnertoni</i>       |            | <i>G. pallidipes</i> |                            |            |              |
|------------------------------|----------------------|--------------|-----------------------------|------------|----------------------|----------------------------|------------|--------------|
|                              | T+                   | T-           | T+                          | T-         | T+                   | T-                         |            |              |
| S+                           | 7 (0.96%)            | 61 (8.37%)   | S+                          | 1 (3.23%)  | 0 (0.00%)            | W+                         | 1 (0.14%)  | 17 (2.33%)   |
| S-                           | 16 (2.19 %)          | 645 (88.47%) | S-                          | 4 (12.90%) | 26 (83.87%)          | W-                         | 22 (3.02%) | 689 (94.51%) |
| P = 0.0033*; $\alpha < 0.05$ |                      |              | P = 0.1613; $\alpha > 0.05$ |            |                      | P = 0.555; $\alpha > 0.05$ |            |              |

## 292 **Discussion**

293 Transmission of vector-borne diseases is dependent on the vector competence and the  
294 interactions between their vectors and vertebrate hosts that are reservoirs of the parasites  
295 [12,38,39]. This cross-sectional study focused on the transmission of AAT in the MMNR, a  
296 wildlife ecology in Kenya, with respect to the sources of tsetse fly blood-meals and the potential  
297 impact of three endosymbionts on their infection with animal trypanosomes. Our findings  
298 revealed that humans, hippopotamus, and African buffaloes were the most frequent blood-meal  
299 sources of tsetse flies in the MMNR. We also found that the endosymbiont, *S. glossinidius*, was  
300 positively correlated with trypanosome infection in wild-caught *G. pallidipes* tsetse flies in the  
301 MMNR, supporting the hypothesis that *Sodalis* potentiates AAT transmission in tsetse flies [40–  
302 42]. However, we found no correlation between *Wolbachia* and trypanosome infections, and no  
303 evidence of SGHV endosymbionts in the tsetse populations analyzed. These findings emphasize  
304 the importance of understanding the complete spectrum of interactions amongst vertebrates,  
305 tsetse fly vectors, endosymbionts, and trypanosome parasites, particularly in the context of  
306 wildlife-livestock-human interfaces where emergence and reemergence of AAT and other  
307 vector-borne diseases are reported.

308 *Glossina pallidipes* was the most abundant tsetse species sampled in the MMNR in this  
309 study, while *G. swynnertoni* was less abundant. This finding corroborates previous studies in  
310 which these two savannah tsetse species were found to be predominant in the Maasai Mara-  
311 Serengeti ecosystem of Kenya and Tanzania [43–45]. As both species are competent vectors of  
312 human and animal trypanosomes [46,47], their presence highlights the persistent risk of AAT  
313 and HAT in the MMNR. Despite their lower abundance relative to *G. pallidipes*, *G. swynnertoni*  
314 had higher rates of infection with trypanosomes, underpinning its critical role in transmission of



315 African trypanosomes as demonstrated by previous studies [48]. However, unlike *G. pallidipes*,  
316 which is widely distributed across many habitats in Kenya, the geographical range of *G.*  
317 *swynnertoni* is limited to a narrow belt within the Maasai Mara-Serengeti ecosystem, which has  
318 resulted in the prioritization of this tsetse species as a target for elimination in East Africa [49].  
319 Extensive efforts have been employed over the last four decades to reduce *G. swynnertoni*  
320 populations using various techniques as comprehensively reviewed by Nagagi and co-workers  
321 [49]. These have included spraying with both residual and non-residual insecticides, use of  
322 mechanical traps and baits with insecticide-impregnated traps or cloth targets, and insecticide-  
323 treated animals as live mobile targets. Coordinated studies are needed to evaluate their effect on  
324 tsetse populations and quantify their impact in East Africa.

325         Despite recent cases of HAT (caused by *T. b. rhodensiense*) being reported in East Africa  
326 [50], the trypanosome species identified in this study are only those responsible for causing  
327 trypanosomiasis in animals. Kenya is currently classified by the WHO as a country with  
328 diminished incidence of HAT (<10 cases in the last decade), with the recent cases being reported  
329 in 2012 in tourists returning from the MNRR [23,24]. Nevertheless, the persistent presence of *G.*  
330 *pallidipes* and *G. swynnertoni*, which are competent vectors of *T. b. rhodensiense*, coupled with  
331 the relatively higher incidences of HAT in neighboring Tanzania and Uganda and increased  
332 tourism, reinforces the need for coordinated surveillance and diagnosis in the MMNR and other  
333 HAT foci in eastern Africa. With reference to animal trypanosomes, this study identified *T. vivax*  
334 as the most prevalent species, followed by *T. congolense* and *T. brucei brucei*. Our findings are  
335 congruent with previous findings within the East African savannah [51,52]. The higher numbers  
336 of flies infected with *T. vivax* may be due to differences in development cycles in tsetse flies; *T.*  
337 *vivax* has all its development stages in the fly's proboscis unlike *T. congolense* and *T. brucei*,

338 which establish in the fly mid-gut where they are affected by low pH, proteases, and lectins  
339 [53,54]. Moreover, *T. vivax* usually achieves higher parasitemia in hosts than do *T. congolense*  
340 and *T. brucei*, further increasing its chances of being transmitted to tsetse flies during blood-  
341 feeding on infected hosts [54]. Infection rates were similar for both female and male tsetse flies,  
342 as found in another recent study conducted in Mtito Andei, Kenya [47].

343         The greater abundance of *G. pallidipes*, but higher trypanosome infection rate observed  
344 in *G. swynnertoni*, in the MMNR highlights the need for understanding the difference in  
345 susceptibility between the two tsetse species. Vector susceptibility of *G. pallidipes* to mid-gut  
346 trypanosomes has been shown to be lower compared to *G. morsitans morsitans* and *G. morsitans*  
347 *centralis* [55,56]. Further still, it has been shown that tsetse protection against trypanosome  
348 invasion is different for *G. pallidipes* and *G. morsitans morsitans* [56]. Similarly, field studies  
349 have shown *G. swynnertoni* to be more susceptible than *G. pallidipes* [46,49]. Given that *G.*  
350 *swynnertoni* is an important species in the Mara-Serengeti ecosystem, its potentially greater  
351 susceptibility to trypanosome infection needs further investigation to elucidate its relative role in  
352 trypanosome transmission relative to the more abundant sympatric *G. pallidipes*.

353         Blood feeding of tsetse fly populations in the wild is influenced by the composition of  
354 vertebrate host species in an area and how these species attract tsetse flies [12]. Our  
355 identification of animal trypanosome DNA in flies with hippopotamus and African buffalo  
356 blood-meals was not surprising as these vertebrates are known to be reservoirs for *T. vivax*, *T.*  
357 *congolense*, and *T. brucei* [12,55]. Nevertheless, these results suggest that active transmission  
358 cycle of animal trypanosomiasis in this wildlife-livestock interface may be maintained by  
359 multiple potential vertebrate hosts. Despite the abundance of wildebeest, zebra, and other  
360 antelopes when the study was conducted during the Great Migration season, no blood-meals

361 from these hosts were detected in the tsetse flies. These findings are congruent with previous  
362 reports that *G. pallidipes* and *G. swynnertoni* exhibit significant specificity in host selection  
363 whereby wildebeest are not preferred blood-meal sources [57,58], and that zebra skin odors are  
364 repellant to *G. pallidipes* [59]. The influx of people in the MMNR due to high tourism activities  
365 in the Great Migration season, may partially explain why humans were frequent blood-meal  
366 sources. Identification of mixed blood-meals from humans and wildlife is indicative of the  
367 inherent risk of HAT transmission in the MMNR [11,12], even though *T. b. rhodensiense* was  
368 not detected in this study.

369 Visual cues and odors released by vertebrate hosts influence tsetse fly host choice and  
370 have been pivotal to the development of baited traps and targets for the control and management  
371 of tsetse fly populations, HAT, and AAT. A tsetse repellant formulation mimicking the odor of  
372 waterbuck (*Kobus ellipsiprymnus defassa*), a non-host animal, was recently developed and used  
373 as an innovative collar device to protect cattle from tsetse bites and AAT [60]. Visual cues have  
374 been extensively exploited in the development of improved traps – stationery and mobile targets  
375 impregnated with insecticides for riverine/”palpalis” [61–63] and savannah/”morsitans” [49,64]  
376 groups of tsetse. However, it has been noted that for the morsitans group of tsetse flies, including  
377 *G. pallidipes* and *G. swynnertoni*, host odors play a more significant role than visual cues as they  
378 strongly attract the tsetse flies across long ranges of up to 100 m [65]. Acetone and butanone  
379 odors obtained from cattle have long been used as attractants of choice in tsetse fly control [66].  
380 However, other better tsetse fly attractants, such as 2-propanol, have been identified [67]. Our  
381 observed high rates of buffalo, hippopotamus, and human blood-meals imply that  
382 semiochemicals from these vertebrates may be possible candidates to advance research for novel  
383 host-derived cues in control of *G. pallidipes* and *G. swynnertoni*. Better understanding of the

384 molecular mechanisms of tsetse fly olfaction associated with host selection can help to evaluate  
385 candidate host semiochemicals as potential attractants or repellants [67–69]. Knowledge of  
386 emergent repellent odors (such as those described from zebra and waterbuck) [59,60], coupled  
387 with new host attractants, present unique opportunities to further improve tsetse bait technology  
388 using “Push-Pull” and/or “Attract-and-Kill” approaches.

389 This study further highlights the sensitivity of HRM technique to accurately, reliably,  
390 rapidly, and reproducibly identify arthropod blood-meal hosts. We were able to identify blood-  
391 meals from wild-caught non-engorged flies. Unlike serological and other PCR-based techniques  
392 for blood-meal identification [57,70,71], the use of HRM to detect sequence variants is fast, cost-  
393 effective, accurate, easy-to-use, and sensitive, making it a more economical tool for blood-meal  
394 analysis [30,72] and pathogen detection/identification [71,73,74]. Sequencing of representative  
395 samples with combined human-hippopotamus and human-African buffalo peaks confirmed their  
396 mixed blood-meal status (S2 Fig.).

397 Our finding that higher proportions of tsetse flies infected with the endosymbiont *S.*  
398 *glossinidius* were infected with trypanosomes than those without *S. glossinidius* corroborates  
399 previous studies that suggest that *S. glossinidius* infection may have the potential to increase the  
400 ability of both wild caught [40,41] and lab reared [42,75] tsetse flies to acquire trypanosomes.  
401 Further, this finding implies that *S. glossinidius* infection in tsetse populations may be used as a  
402 positive indicator of trypanosomiasis risk. Nonetheless, the functional role of *S. glossinidius* in  
403 tsetse flies was not explored in this study and knowledge on the same remains limited [76].  
404 However, inhibition of tsetse mid-gut and mouthpart lectins by Nacetyl-d-glucosamine  
405 (GlcNAc), a product of chitin catabolism by *S. glossinidius*, has been proposed as the main factor  
406 associated with *S. glossinidius* and increased tsetse-vector competence [18,77,78]. Nevertheless,

407 this association is complex and a number of other factors, including geographic location, tsetse  
408 fly species, sex, and age also affect the capacity of *S. glossinidius* to increase vector competence  
409 in wild-caught tsetse flies [77]. While more studies are needed to elucidate the role of *Sodalis*  
410 endosymbionts on tsetse competence to vector trypanosomes, our findings support that *S.*  
411 *glossinidius* infection increases probability of savannah tsetse flies to acquire animal  
412 trypanosome infection in this wildlife-livestock interface.

### 413 **Conclusions**

414 Emergence and/or reemergence of AT, especially in human-wildlife-interfaces like the MMNR,  
415 where AT has been recently reported, happens occasionally. With limitations on current methods  
416 of control and management of AT and its tsetse fly vectors, more research on the factors  
417 influencing trypanosome transmission is required. Identification of trypanosome-infected tsetse  
418 flies that had fed on hippopotamus and African buffalo highlights these two vertebrate species as  
419 possible reservoirs of trypanosomes in the MMNR, providing a basis for investigating their  
420 contributions to AT in other human-wildlife-interfaces. Further understanding of the  
421 attractiveness of hippopotamus and expounding on existing knowledge on African buffalo to  
422 tsetse flies based on the volatiles they release may help improve tsetse baits and repellants. In  
423 addition, our findings demonstrate that the endosymbiont *S. glossinidius* increases tsetse fly  
424 susceptibility to trypanosome infection in this endemic ecology. These findings support the idea  
425 that *S. glossinidius* can be a potential target for vector control [79]. Despite *T. b. rhodensiense*  
426 not being detected, it has previously been reported in the MMNR. Hence, there is need for  
427 intense prevalence studies of *T. b. rhodensiense* in tsetse flies from the MMNR.

428

429

## 430 **Acknowledgments**

431 The authors thank Daniel Ouso and Edwin Ogola (*icipe*) for their contributions in blood-meal  
432 analysis protocol and positive controls. Antoinette Miyunga, Stephen Mwiu, Vasco Nyaga,  
433 Dennis Lemayian and Richard Bolo (all of KWS) are acknowledged for their assistance in field  
434 sampling. We are also thankful to Mr. James Kabii (*icipe*) for his technical support and logistics  
435 in carrying out this project.

436

## 437 **Funding**

438 We are grateful for the financial support for this research from the United States Agency for  
439 International Development (USAID), Partnerships for Enhanced Engagement in Research  
440 (USAID-PEER) cycle 4 under the USAID grant No. AID-OAA-A-11-00012, sub-awarded to  
441 LW by the American National Academy of Sciences (NAS) under agreement No. 2000006204,  
442 and *icipe* institutional funding from the UK's Department for International Development (DFID),  
443 the Swedish International Development Cooperation Agency (SIDA), the Swiss Agency for  
444 Development and Cooperation (SDC), and the Kenyan Government.

445

## 446 **Author's contributions**

447 Conceived and designed the experiments: LW, JV, MJ, VOA. Performed the experiments: EEM,  
448 EM, JWO, AAM. Analyzed the data: EEM, JV, LW, VOA, EMK. Tsetse collection: LW, JV,  
449 MJ. Tsetse fly identification: EEM. Wrote the paper: EEM, LW, JV, VOA, MJ, EMK.  
450 Manuscript revision: All authors.

451

## 452 **References**

- 453 1. Franco J, Simarro P, Diarra A, Postigo RJA, Jannin. Diversity of human African  
454 trypanosomiasis epidemiological settings requires fine-tuning control strategies to  
455 facilitate disease elimination. *Res Rep Trop Med*. 2013;4: 1–6.
- 456 2. Cecchi G, Paone M, Feldmann U, Vreysen MJ, Diall O, Mattioli RC. Assembling a  
457 geospatial database of tsetse-transmitted animal trypanosomosis for Africa. *Parasites and*  
458 *Vectors*. 2014;7(1): 39–48.
- 459 3. Bukachi SA, Wandibba S, Nyamongo IK. The socio-economic burden of human African  
460 trypanosomiasis and the coping strategies of households in the South Western Kenya foci.  
461 *PLoS Negl Trop Dis*. 2017;11(10): e0006002.
- 462 4. Muhanguzi D, Mugenyi A, Bigirwa G, Kamusiime M, Kitibwa A, Akurut GG, et al.  
463 African animal trypanosomiasis as a constraint to livestock health and production in  
464 Karamoja region: A detailed qualitative and quantitative assessment. *BMC Vet Res*.  
465 2017;13(1): 355–367.
- 466 5. Chitanga S, Marcotty T, Namangala B, van den Bossche P, van den Abbeele J, Delespaux  
467 V. High prevalence of drug resistance in animal trypanosomes without a history of drug  
468 exposure. *PLoS Negl Trop Dis*. 2011;5(12): e1454.
- 469 6. Delespaux V, Geysen D, Van den Bossche P, Geerts S. Molecular tools for the rapid  
470 detection of drug resistance in animal trypanosomes. *Trends Parasitol*. 2008;24(5):236–42.
- 471 7. Kotlyar S. Recommendations for control of East African sleeping sickness in Uganda. *J*  
472 *Glob Infect Dis*. 2010;2(1): 43–48.

- 473 8. Meyer A, Holt HR, Selby R, Guitian J. Past and ongoing tsetse and animal  
474 trypanosomiasis control operations in five African countries: A systematic Review. PLoS  
475 Negl Trop Dis. 2016;10(12): e0005247.
- 476 9. Scolari F, Benoit JB, Michalkova V, Aksoy E, Takac P, Abd-Alla AMM, et al. The  
477 Spermatophore in *Glossina morsitans morsitans*: Insights into male contributions to  
478 reproduction. Sci Rep. 2016;6(2015): 20334–20336.
- 479 10. Benoit JB, Attardo GM, Baumann AA, Michalkova V, Aksoy S. Adenotrophic viviparity  
480 in tsetse flies: Potential for population control and as an insect model for lactation. Annu  
481 Rev Entomol. 2015;60(1): 351–371.
- 482 11. Wambwa E. Diseases of importance at the wildlife-livestock interface in Kenya. In:  
483 Osofsky SA, Cleaveland S, Karesh WB, Kock MD, Nyhus PJ, Starr L, Yang A, editors.  
484 Conservation and development interventions at the wildlife/livestock interface:  
485 Implications for wildlife, livestock and human health. Gland, Switzerland: IUCN Species  
486 Survival Commission; 2005. pp. 21–25.
- 487 12. Hamisi S Nyingilili IIM& GN. Diversity of blood meal hosts in *Glossina pallidipes* and  
488 its role in the epidemiology of trypanosomiasis at a localized area in Serengeti National  
489 Park. Imp J Interdiscip Res. 2016;2(11):1694–1698.
- 490 13. Dale C, Welburn SC. The endosymbionts of tsetse flies: Manipulating host-parasite  
491 interactions. Int J Parasitol. 2001;31(5–6): 628–631.
- 492 14. Aksoy S. Control of tsetse flies and trypanosomes using molecular genetics. Vet Parasitol.  
493 2003;115(2): 125–145.



- 494 15. Munangandu HM, Siamudaala V, Munyeme M, Nalubamba KS. A review of ecological  
495 factors associated with the epidemiology of wildlife trypanosomiasis in the Luangwa and  
496 Zambezi valley ecosystems of Zambia. *Interdiscip Perspect Infect Dis*. 2012;2012:  
497 372523.
- 498 16. Geiger A, Ponton F, Simo G. Adult blood-feeding tsetse flies, trypanosomes, microbiota  
499 and the fluctuating environment in sub-Saharan Africa. *ISME J*. 2015;9(7): 1496–1507.
- 500 17. Kariithi HM, Meki IK, Schneider DI, De Vooght L, Khamis FM, Geiger A, et al.  
501 Enhancing vector refractoriness to trypanosome infection: Achievements, challenges and  
502 perspectives. *BMC Microbiol*. 2018;18(Suppl 1): 3–15.
- 503 18. Welburn SC, Maudlin I. Tsetse-trypanosome interactions: Rites of passage. *Parasitol*  
504 *Today*. 1999;15(10): 399–403.
- 505 19. Wamwiri FN, Changasi RE. Tsetse Flies (*Glossina*) as vectors of human African  
506 Trypanosomiasis: A review. *Biomed Res Int*. 2016;2016: 6201350.
- 507 20. Floate KD, Kyei-Poku GK, Coghlin PC. Overview and relevance of *Wolbachia* bacteria in  
508 biocontrol research. *Biocontrol Sci Technol*. 2006;16(8): 767–788.
- 509 21. Doudoumis V, Tsiamis G, Wamwiri F, Brelsfoard C, Alam U, Aksoy E, et al. Detection  
510 and characterization of *Wolbachia* infections in laboratory and natural populations of  
511 different species of tsetse flies (genus *Glossina*). *BMC Microbiol*. 2012;12(Suppl. 1): S3.
- 512 22. Aksoy S, Caccone A, Galvani AP, Okedi LM. *Glossina fuscipes* populations provide  
513 insights for human African trypanosomiasis transmission in Uganda. *Trends Parasitol*.

- 514 2013;29(8): 394–406.
- 515 23. Clerinx J, Vlieghe E, Asselman V, van de Castele S, Maes MB, Lejon V. Human African  
516 trypanosomiasis in a Belgian traveller returning from the Masai Mara area, Kenya,  
517 February 2012. *Eurosurveillance*. 2012;17(10): 4–7.
- 518 24. Wolf T, Wichelhaus T, Göttig S, Kleine C, Brodt HR, Just-Nuebling G. *Trypanosoma*  
519 *brucei rhodesiense* infection in a German traveller returning from the Masai Mara area,  
520 Kenya. *Eurosurveillance*. 2012;17(10): 2–4.
- 521 25. Pollock JN. Description and keys for the identification of *Glossina* species. In: Training  
522 Manual for Tsetse Control Personnel. Rome: FAO; 1982. p. 147–87.
- 523 26. Adams ER, Hamilton PB, Malele II, Gibson WC. The identification, diversity and  
524 prevalence of trypanosomes in field caught tsetse in Tanzania using ITS-1 primers and  
525 fluorescent fragment length barcoding. *Infect Genet Evol*. 2008;8(4): 439–444.
- 526 27. Njiru ZK, Constantine CC, Guya S, Crowther J, Kiragu JM, Thompson RCA, et al. The  
527 use of ITS1 rDNA PCR in detecting pathogenic African trypanosomes. *Parasitol Res*.  
528 2005;95(3): 186–192.
- 529 28. Picozzi K, Carrington M, Welburn SC. A multiplex PCR that discriminates between  
530 *Trypanosoma brucei brucei* and zoonotic *T. b. rhodesiense*. *Exp Parasitol*. 2008;118(1):  
531 41–46.
- 532 29. Masiga DK, Smyth AJ, Hayes P, Bromidge TJ, Gibson WC. Sensitive detection of  
533 trypanosomes in tsetse flies by DNA amplification. *Int J Parasitol*. 1992;22(7): 909–918.

- 534 30. Omondi D, Masiga DK, Ajamma YU, Fielding BC, Njoroge L, Villinger J. Unraveling  
535 host-vector-arbovirus interactions by two-gene high resolution melting mosquito  
536 bloodmeal analysis in a Kenyan wildlife-livestock interface. PLoS One. 2015;10(7):  
537 e0134375.
- 538 31. Ogola E, Villinger J, Mabuka D, Omondi D, Orindi B, Mutunga J, et al. Composition of  
539 *Anopheles* mosquitoes, their blood-meal hosts, and *Plasmodium falciparum* infection rates  
540 in three islands with disparate bed net coverage in Lake Victoria, Kenya. Malar J.  
541 2017;16: 360.
- 542 32. Ouso DO, Otiende MY, Jeneby M, Oundo JW, Bargul JL, Miller S, et al. Three-gene PCR  
543 and high-resolution melting analysis for differentiating vertebrate species mitochondrial  
544 DNA for forensic and biodiversity research pipelines. Sci Rep. 2020;10: 4741.
- 545 33. Kearse M, Moir R, Wilson A, Stones-Havas S, Cheung M, Sturrock S, et al. Geneious  
546 Basic: An integrated and extendable desktop software platform for the organization and  
547 analysis of sequence data. Bioinformatics. 2012;28(12): 1647–1649.
- 548 34. Altschul SF, Gish W, Miller W, Myers EW, Lipman DJ. Basic local alignment search  
549 tool. J Mol Biol. 1990;215(3): 403–410.
- 550 35. Snyder AK, Adkins KZ, Rio RVM. Use of the internal transcribed spacer (ITS) regions to  
551 examine symbiont divergence and as a diagnostic tool for *Sodalis*-related bacteria. Insects.  
552 2011;2(4): 515–531.
- 553 36. Werren JH, Windsor DM. Wolbachia infection frequencies in insects: Evidence of a  
554 global equilibrium? Proc R Soc B Biol Sci. 2000;267(1450): 1277–1285.

- 555 37. Abd-Alla AMM, Salem TZ, Parker AG, Wang Y, Jehle JA, Vreysen MJB, et al. Universal  
556 primers for rapid detection of hytrosaviruses. *J Virol Methods*. 2011;171(1): 280–283.
- 557 38. Azambuja P, Garcia ES, Ratcliffe NA. Gut microbiota and parasite transmission by insect  
558 vectors. *Trends Parasitol*. 2005;21(12): 568–572.
- 559 39. Gottdenker NL, Chaves LF, Calzada JE, Saldaña A, Carroll CR. Host life history strategy,  
560 species diversity, and habitat influence *Trypanosoma cruzi* vector infection in changing  
561 landscapes. *PLoS Negl Trop Dis*. 2012;6(11): 5–7.
- 562 40. Farikou O, Njiokou F, Mbida Mbida JA, Njitchouang GR, Djeunga HN, Asonganyi T, et  
563 al. Tripartite interactions between tsetse flies, *Sodalis glossinidius* and trypanosomes-An  
564 epidemiological approach in two historical human African trypanosomiasis foci in  
565 Cameroon. *Infect Genet Evol*. 2010;10(1): 115–121.
- 566 41. Wamwiri FN, Alam U, Thande PC, Aksoy E, Ngure RM, Aksoy S, et al. *Wolbachia*,  
567 *Sodalis* and trypanosome co-infections in natural populations of *Glossina austeni* and  
568 *Glossina pallidipes*. *Parasites and Vectors*. 2013;6(1): 1–11.
- 569 42. Wamwiri FN, Ndungu K, Thande PC, Thungu DK, Auma JE, Ngure RM, et al. Infection  
570 with the secondary tsetse-endosymbiont *Sodalis glossinidius* (Enterobacteriales:  
571 Enterobacteriaceae) influences parasitism in *Glossina pallidipes* (Diptera: *Glossinidae*). *J*  
572 *Insect Sci*. 2014;14: 272.
- 573 43. Ouma JO, Marquez JG, Krafur ES. Microgeographical breeding structure of the tsetse  
574 fly, *Glossina pallidipes* in south-western Kenya. *Med Vet Entomol*. 2006;20(1): 138–149.

- 575 44. Mramba F, Oloo F, Byamungu M, Kröber T, McMullin A, Mihok S, et al. Standardizing  
576 visual control devices for tsetse flies: East African species *Glossina swynnertoni*. PLoS  
577 Negl Trop Dis. 2013;7(2): e2063.
- 578 45. Ndegwa PN, Mihok S, Oyieke F. A. Habitat preferences and activity patterns of *Glossina*.  
579 Insect Sci Applic. 2001;21(2):113–122.
- 580 46. Malele II, Kinung'hi SM, Nyingilili HS, Matemba LE, Sahani JK, Mlengeya TDK, et al.  
581 *Glossina* dynamics in and around the sleeping sickness endemic Serengeti ecosystem of  
582 northwestern Tanzania. J Vector Ecol. 2007;32(2): 263.
- 583 47. Nthiwa DM, Odongo DO, Ochanda H, Khamadi S, Gichimu BM. *Trypanosoma* infection  
584 rates in *Glossina* species in Mtito Andei Division, Makueni County, Kenya. J Parasitol  
585 Res. 2015;2015: 607432.
- 586 48. Auty H, Anderson NE, Picozzi K, Lembo T, Mubanga J, Hoare R, et al. Trypanosome  
587 diversity in wildlife species from the Serengeti and Luangwa Valley ecosystems. PLoS  
588 Negl Trop Dis. 2012;6(10): e1828.
- 589 49. Nagagi YP, Silayo RS, Kweka EJ. Advancements in bait technology to control *Glossina*  
590 *swynnertoni* Austen, the species of limited distribution in Kenya and Tanzania border: A  
591 review. J Vector Borne Dis. 2017;54(1): 16–24.
- 592 50. Gobbi F, Bisoffi Z. Human African trypanosomiasis in travellers to Kenya.  
593 Eurosurveillance. 2012;17(10): 20109.
- 594 51. Simwango M, Ngonyoka A, Nnko HJ, Salekwa LP, Ole-Neselle M, Kimera SI, et al.

- 595 Molecular prevalence of trypanosome infections in cattle and tsetse flies in the Maasai  
596 Steppe, northern Tanzania. *Parasit Vectors*. 2017;10(1): 507.
- 597 52. Ngonyoka A, Gwakisa PS, Estes AB, Salekwa LP, Nnko HJ, Hudson PJ, et al. Patterns of  
598 tsetse abundance and trypanosome infection rates among habitats of surveyed villages in  
599 Maasai steppe of northern Tanzania. *Infect Dis Poverty*. 2017;6: 126.
- 600 53. Rotureau B, Van Den Abbeele J. Through the dark continent: African trypanosome  
601 development in the tsetse fly. *Front Cell Infect Microbiol*. 2013;3: 53.
- 602 54. Dyer NA, Rose C, Ejeh NO, Acosta-Serrano A. Flying tryps: Survival and maturation of  
603 trypanosomes in tsetse flies. *Trends Parasitol*. 2013;29(4): 188–196.
- 604 55. Peacock L, Ferris V, Bailey M, Gibson W. The influence of sex and fly species on the  
605 development of trypanosomes in tsetse flies. *PLoS Negl Trop Dis*. 2012;6(2): e1515
- 606 56. Mooloo SK, Sabwa CL, Kabata JM. Vector competence of *Glossina pallidipes* and *G.*  
607 *morsitans centralis* for *Trypanosoma vivax*, *T. congolense* and *T. b. brucei*. *Acta Trop*.  
608 1992;51(3–4): 271–280.
- 609 57. Clausen PH, Adeyemi I, Bauer B, Breloer M, Salchow F, Staak C. Host preferences of  
610 tsetse (Diptera: *Glossinidae*) based on bloodmeal identifications. *Med Vet Entomol*.  
611 1998;12(2): 169–180.
- 612 58. Auty H, Cleaveland S, Malele I, Masoy J, Lembo T, Bessell P, et al. Quantifying  
613 heterogeneity in host-vector contact: Tsetse (*Glossina swynnertoni* and *G. pallidipes*) host  
614 choice in Serengeti National Park, Tanzania. *PLoS One*. 2016;11(10): e0161291.

- 615 59. Olaide OY, Tchouassi DP, Yusuf AA, Pirk CWW, Masiga DK, Saini RK, et al. Zebra skin  
616 odor repels the savannah tsetse fly, *Glossina pallidipes* (Diptera: *Glossinidae*). PLoS Negl  
617 Trop Dis. 2019;13(6): e0007460.
- 618 60. Saini RK, Orindi BO, Mbahin N, Andoke JA, Muasa PN, Mbuvi DM, et al. Protecting  
619 cows in small holder farms in East Africa from tsetse flies by mimicking the odor profile  
620 of a non-host bovid. PLoS Negl Trop Dis. 2017;11(10): e0005977.
- 621 61. Lindh JM, Torr SJ, Vale GA, Lehane MJ. Improving the cost-effectiveness of artificial  
622 visual baits for controlling the tsetse fly *Glossina fuscipes fuscipes*. PLoS Negl Trop Dis.  
623 2009;3(7): e474.
- 624 62. Rayaisse JB, Esterhuizen J, Tirados I, Kaba D, Salou E, Diarrassouba A, et al. Towards an  
625 optimal design of target for tsetse control: Comparisons of novel targets for the control of  
626 palpalis group tsetse in West Africa. PLoS Negl Trop Dis. 2011;5(9): e1332.
- 627 63. Kaba D, Zacarie T, M'Pondi AM, Njiokou F, Bosson-Vanga H, Kröber T, et al.  
628 Standardising visual control devices for tsetse flies: Central and West African species  
629 *Glossina palpalis palpalis*. PLoS Negl Trop Dis. 2014;8(1): e2601.
- 630 64. Byamungu M, Zacarie T, Makumyaviri M'Pondi A, Mansinsa Diabakana P, McMullin A,  
631 Kröber T, et al. Standardising visual control devices for tsetse: East and Central African  
632 Savannah species *Glossina swynnertoni*, *Glossina morsitans centralis* and *Glossina*  
633 *pallidipes*. PLoS Negl Trop Dis. 2018;12(9): e0006831.
- 634 65. Groenendijk CA. The behaviour of tsetse flies in an odour plume. Doctoral Thesis,  
635 Wageningen Agricultural University, 1996. Available from

- 636 <https://library.wur.nl/WebQuery/wurpubs/34174>
- 637 66. Torr SJ, Hall DR, Smith JL. Responses of tsetse flies (Diptera: *Glossinidae*) to natural and  
638 synthetic ox odours. Bull Entomol Res. 1995;85(1): 157–166.
- 639 67. Chahda JS, Soni N, Sun JS, Ebrahim SAM, Weiss BL, Carlson JR. The molecular and  
640 cellular basis of olfactory response to tsetse fly attractants. PLoS Genet. 2019;15(3):  
641 e1008005.
- 642 68. Watanabe J, Hattori M, Berriman M, Lehane MJ, Hall N, Solano P, Aksoy S, Hide W,  
643 Touré Y, Attardo GM, Darby AC, Toyoda A, Hertz-Fowler C, Larkin DM, Cotton JA,  
644 Watanabe J, Sanders MJ, Swain MT, Hattori M, Berriman M, Quail MA, Inoue N, Ravel  
645 S, Taylor TD, BJ. Genome sequence of the tsetse Fly (*Glossina morsitans*): Vector of  
646 African trypanosomiasis. Science. 2014;344(6182): 380–386.
- 647 69. Nyanjom SG, Tare C, Wamunyokoli F, Obiero GF. Expression levels of odorant receptor  
648 genes in the savanna tsetse fly, *Glossina morsitans morsitans*. J Med Entomol.  
649 2018;55(4): 855–861.
- 650 70. Meusnier I, Singer GAC, Landry JF, Hickey DA, Hebert PDN, Hajibabaei M. A universal  
651 DNA mini-barcode for biodiversity analysis. BMC Genomics. 2008;9: 214.
- 652 71. Peña VH, Fernández GJ, Gómez-Palacio AM, Mejía-Jaramillo AM, Cantillo O, Triana-  
653 Chávez O. High-resolution melting (HRM) of the cytochrome B gene: A powerful  
654 approach to identify blood-meal sources in Chagas disease vectors. PLoS Negl Trop Dis.  
655 2012;6(2): e1530.



- 656 72. Oundo JW, Villinger J, Jeneby M, Ong'amo G, Otiende MY, Makhulu EE, et al.  
657 Pathogens, endosymbionts, and blood-meal sources of host-seeking ticks in the fast-  
658 changing Maasai Mara wildlife ecosystem. bioRxiv 2020; doi:  
659 10.1101/2020.01.15.907568.
- 660 73. Kipanga PN, Omondi D, Mireji PO, Sawa P, Masiga DK, Villinger J. High-resolution  
661 melting analysis reveals low *Plasmodium* parasitaemia infections among microscopically  
662 negative febrile patients in western Kenya. Malar J. 2014;13:429.
- 663 74. Villinger J, Mbaya MK, Ouso D, Kipanga PN, Lutomiah J, Masiga DK. Arbovirus and  
664 insect-specific virus discovery in Kenya by novel six genera multiplex high-resolution  
665 melting analysis. Mol Ecol Resour. 2017;17(3): 466–480.
- 666 75. Dale C, Welburn SC. The endosymbionts of tsetse flies: Manipulating host-parasite  
667 interactions. Int J Parasitol. 2001;31(5-6): 628-631.
- 668 76. Wang J, Weiss BL, Aksoy S. Tsetse fly microbiota: form and function. Front Cell Infect  
669 Microbiol. 2013;3: 69.
- 670 77. Channumsin M, Ciosi M, Masiga D, Turner CMR, Mable BK. *Sodalis glossinidius*  
671 presence in wild tsetse is only associated with presence of trypanosomes in complex  
672 interactions with other tsetse-specific factors. Genetics. BMC Microbiol. 2018;18(Suppl  
673 1):163.
- 674 78. Xia X, You M, Rao XJ, Yu XQ. Insect C-type lectins in innate immunity. Dev Comp  
675 Immunol. 2018;83: 70–79.

676 79. Geiger A, Malele I, Abd-Alla AM, Njiokou F. Blood feeding tsetse flies as hosts and  
677 vectors of mammals-pre-adapted African *Trypanosoma*: Current and expected research  
678 directions. BMC Microbiol. 2018;18(Suppl 1): 162.

679

## 680 **Supporting Information**

681 **S1 Fig. PCR detection of trypanosome species in tsetse flies.** A. Agarose gel electrophoresis  
682 images of representative tsetse fly samples positive for Trypanozoon, *T. vivax*, and *T. congolense*  
683 PCR amplicons with ITS BR/CR primers specific for African trypanosomes species. The  
684 trypanozoon group were further resolved using primer pairs specific for *T. b. rhodesiense* and *T.*  
685 *b. brucei*. B. PCR amplification results for detection of *T. b. rhodesiense* using primers targeting  
686 the SRA gene. C. PCR amplification results for detection of *T. b. brucei* using primers targeting  
687 the TbbGPI-PLC gene. M represents the molecular ladder – represents negative control and +  
688 represents positive control.

689 **S2 Fig. DNA sequence analysis of mixed blood-meals.** A. Hippopotamus and human mixed  
690 blood-meal cytochrome b sequences aligned and edited using Geneious v8.0.1. B. Buffalo and  
691 human mixed blood-meal cyt b sequences aligned and edited using Geneious v8.0.1. Scientific  
692 names and the GenBank accession numbers highlighted in red represent sequences obtained from  
693 this study.

694 **S3 Fig. PCR detection of endosymbionts in tsetse flies.** A. Agarose gel electrophoresis image  
695 of a representative PCR amplicons of *S. glossinidus* DNA. B. Agarose gel electrophoresis image  
696 of a representative PCR amplicons for *Wolbachia*.

697 **S1 Table. Primer list with annealing temperatures.** Details of primer sequences and PCR  
698 conditions used in this study.

699 **S2 Table. Trypanosome species and host blood-meals among the tsetse fly species in this**  
700 **study.** Distribution of trypanosome infections and blood-meals sources in *Glossina pallidipes*  
701 and *Glossina swynnertoni* in Maasai Mara, Kenya.

702 **S3 Table. Data URL repository associated with this study.** Details of the nucleotide  
703 sequences generated in this study and URLs for obtaining the respective accessions in GenBank.

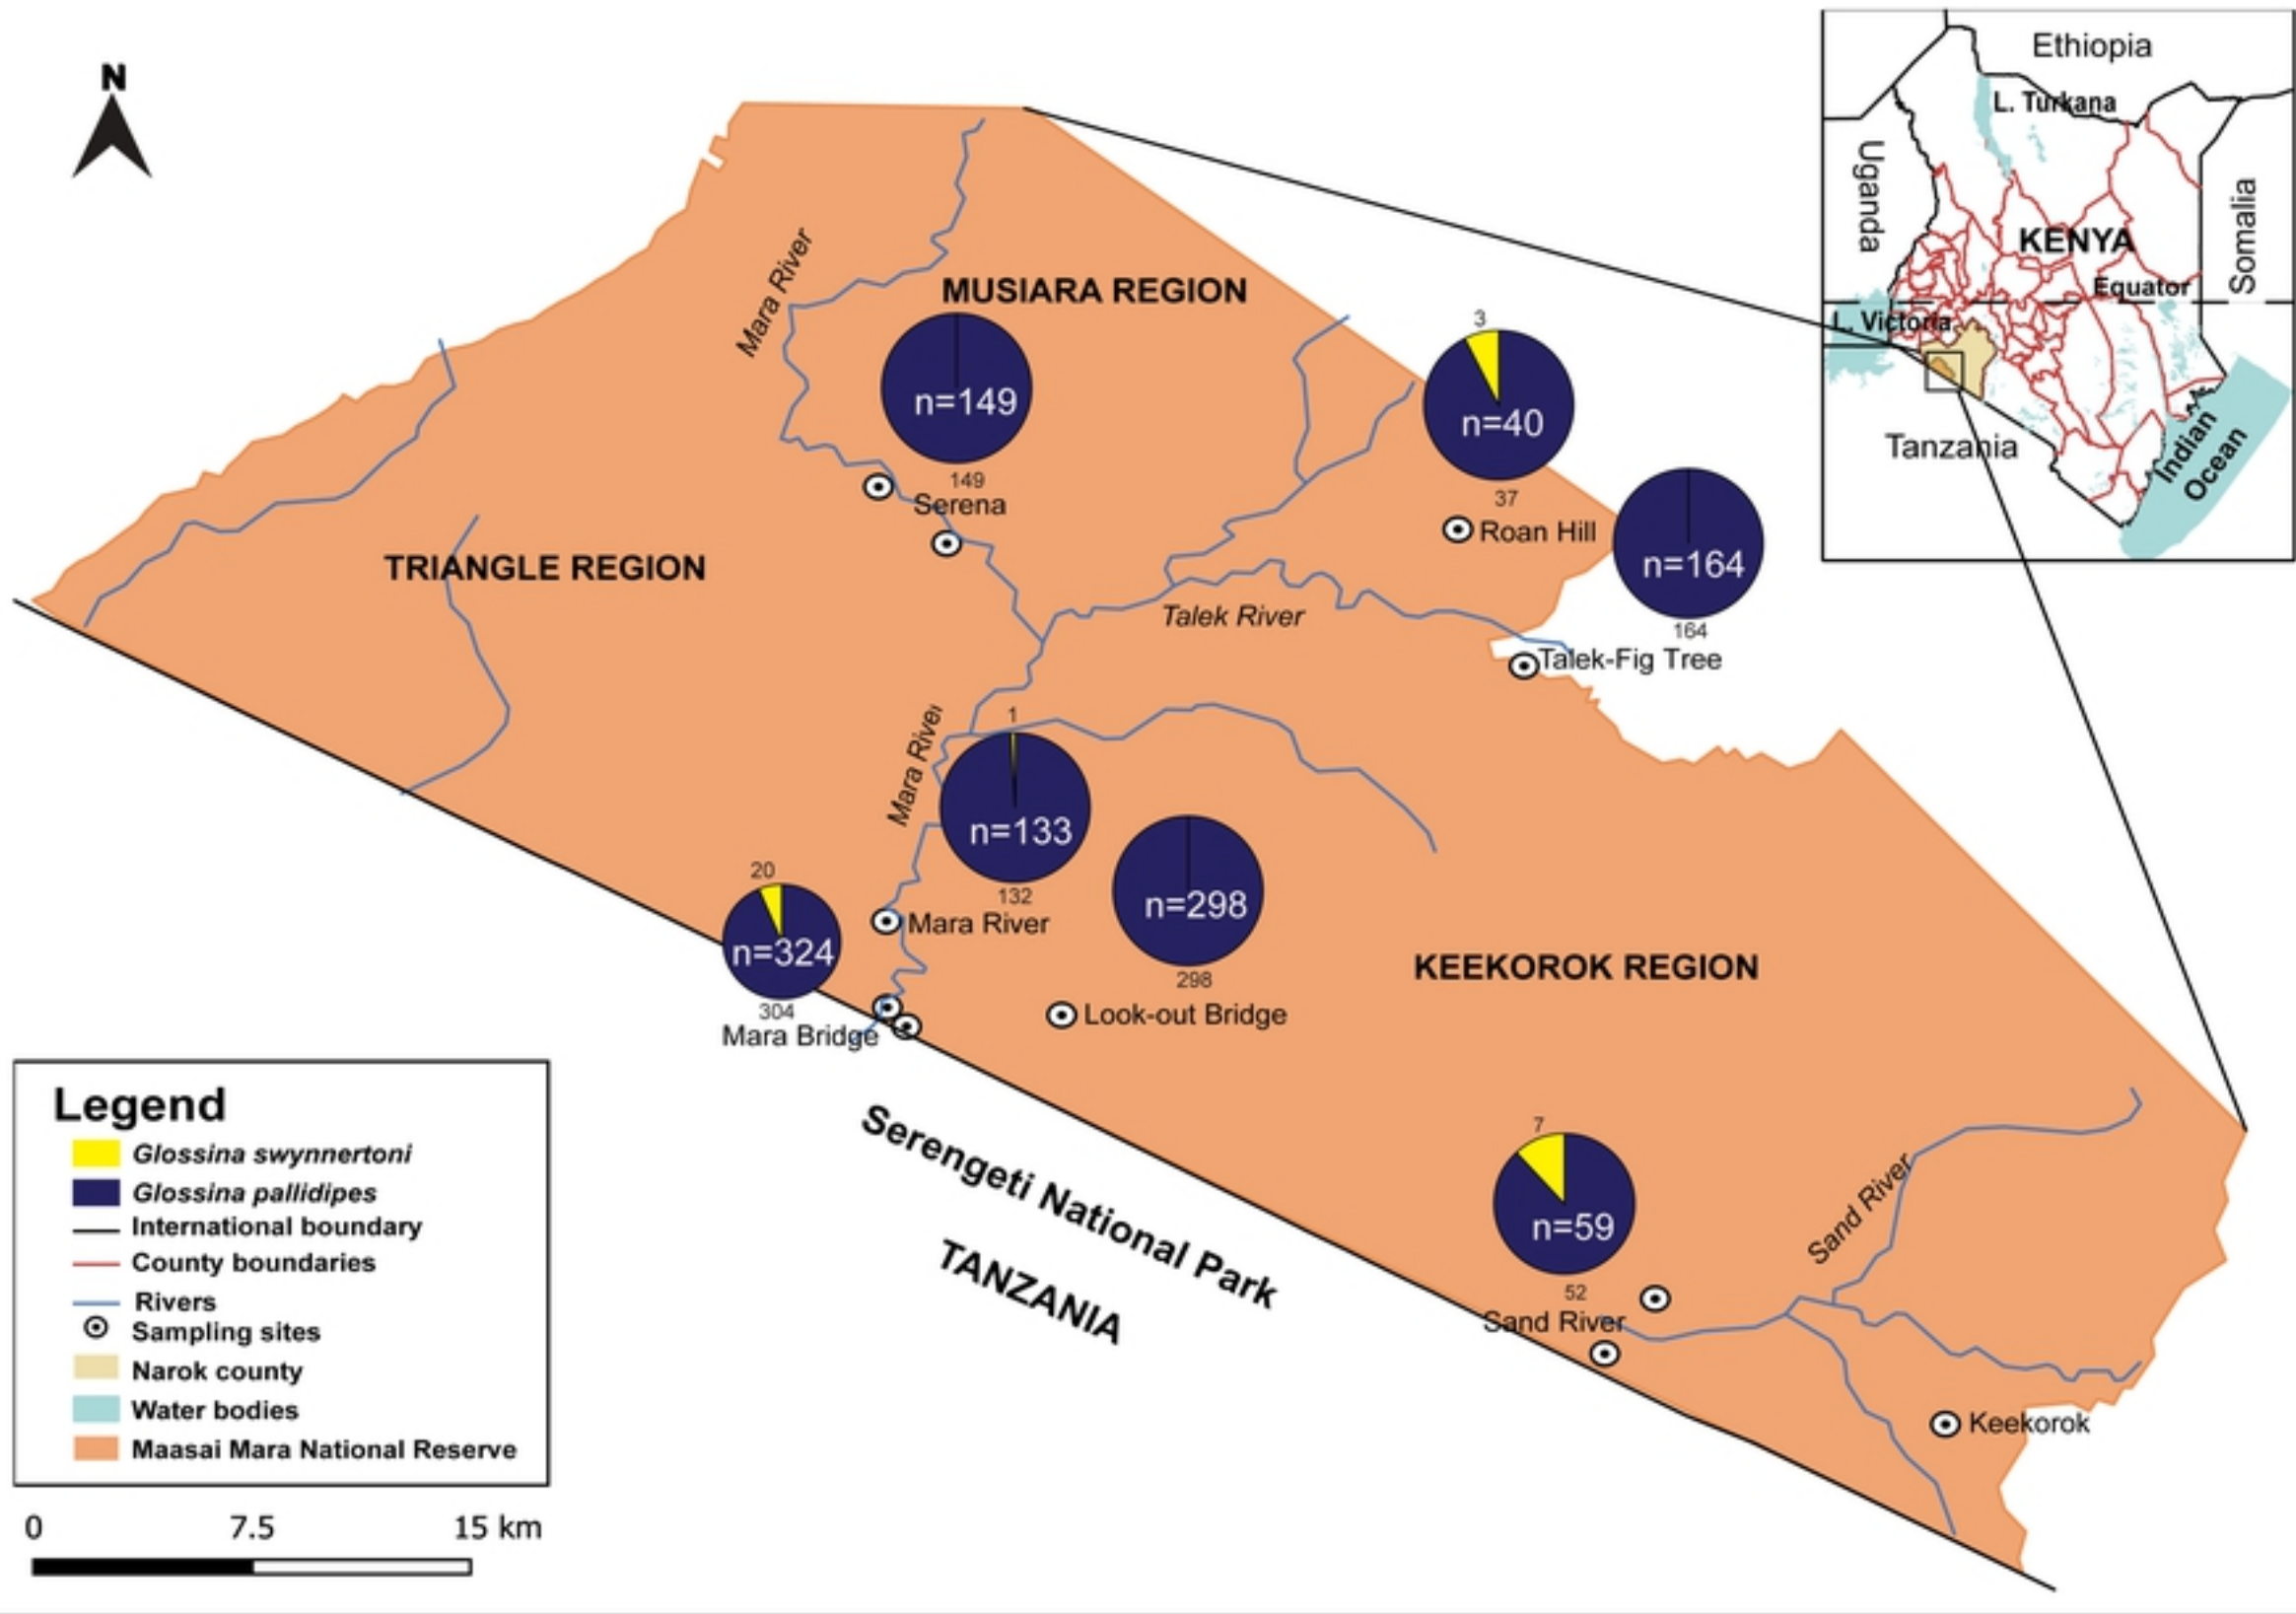

Fig 1

A

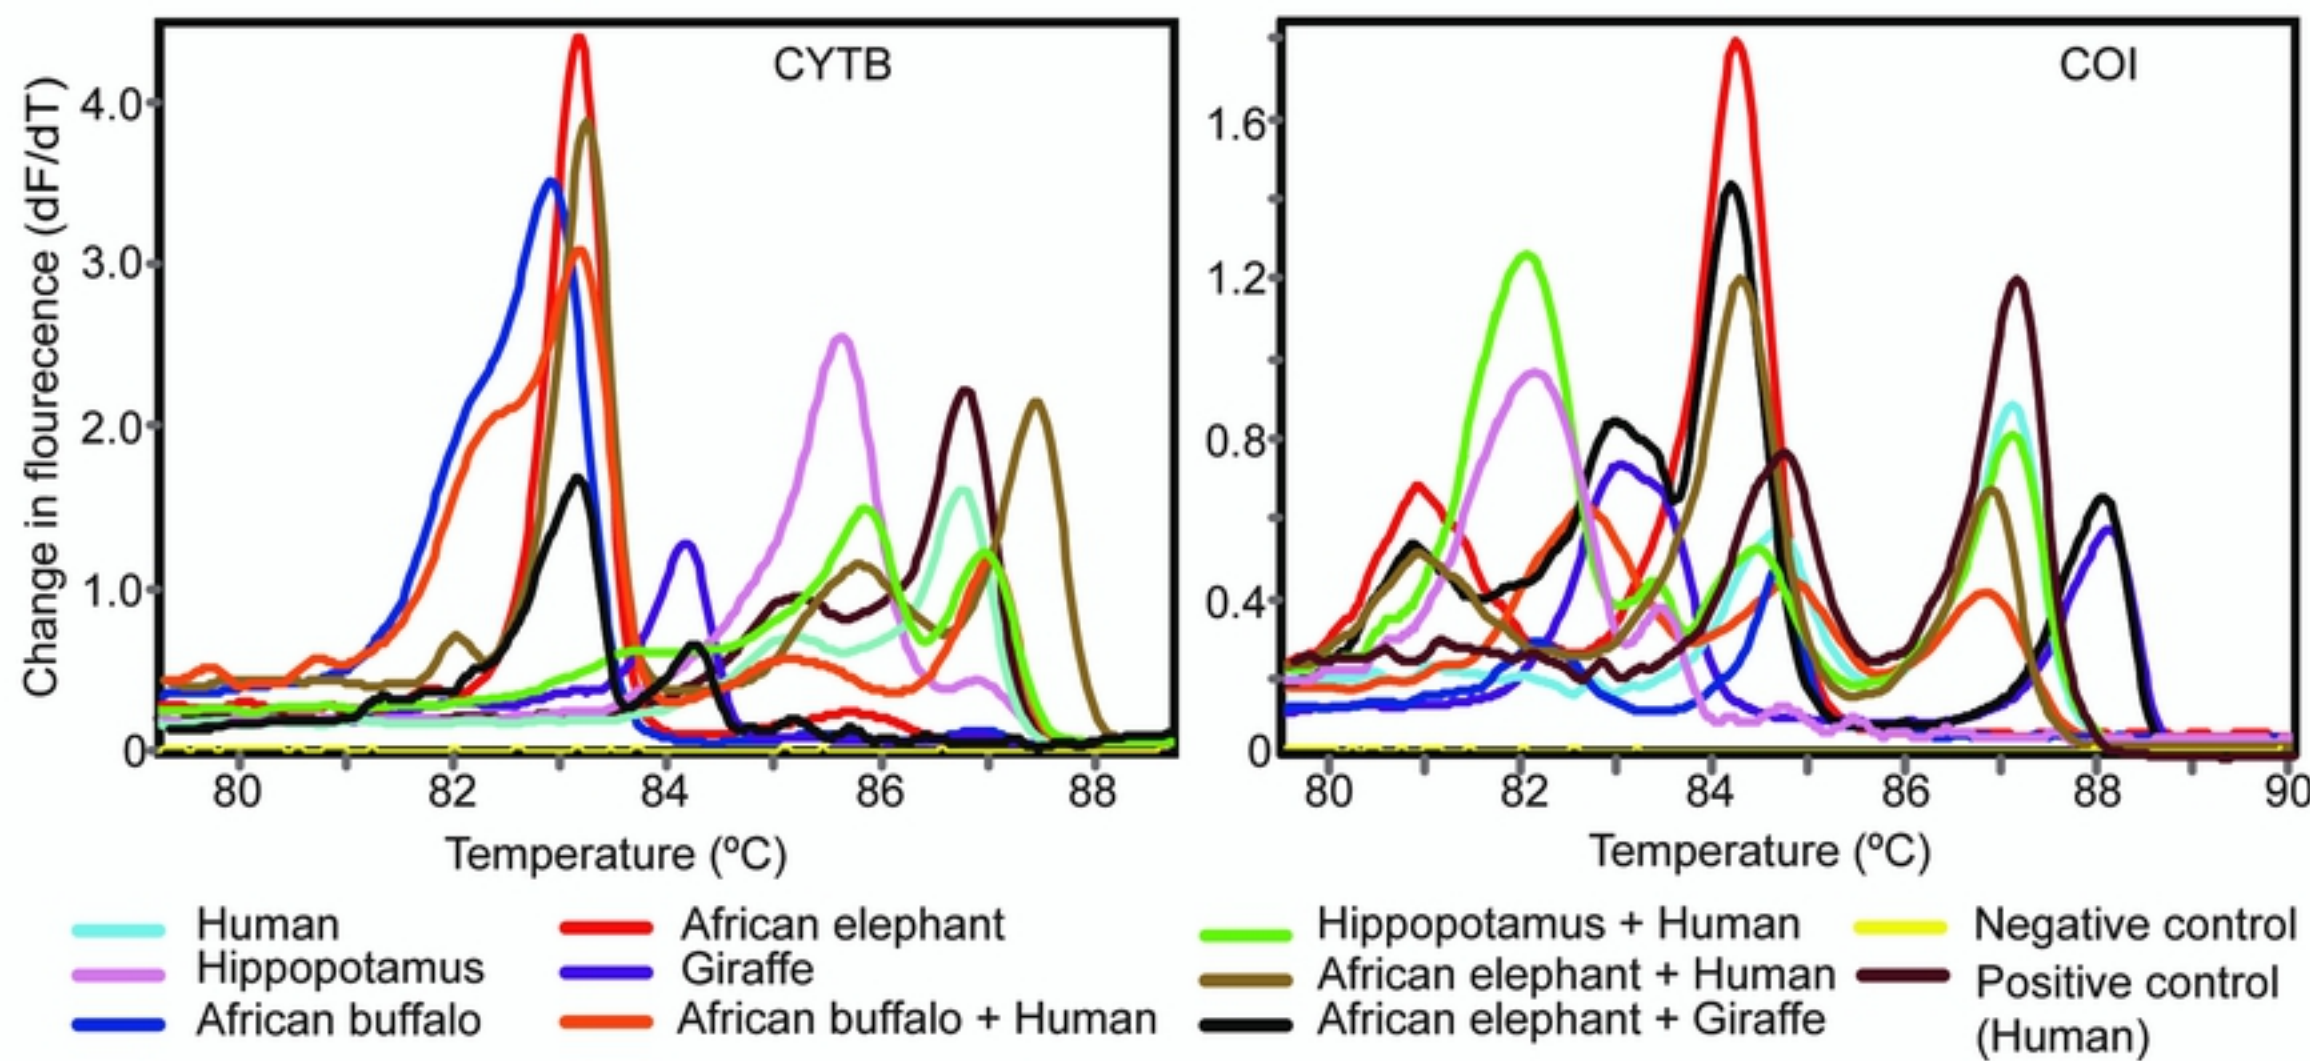

B

bioRxiv preprint doi: <https://doi.org/10.1101/2020.04.06.027367>; this version posted April 6, 2020. The copyright holder for this preprint (which was not certified by peer review) is the author/funder, who has granted bioRxiv a license to display the preprint in perpetuity. It is made available under aCC-BY 4.0 International license.

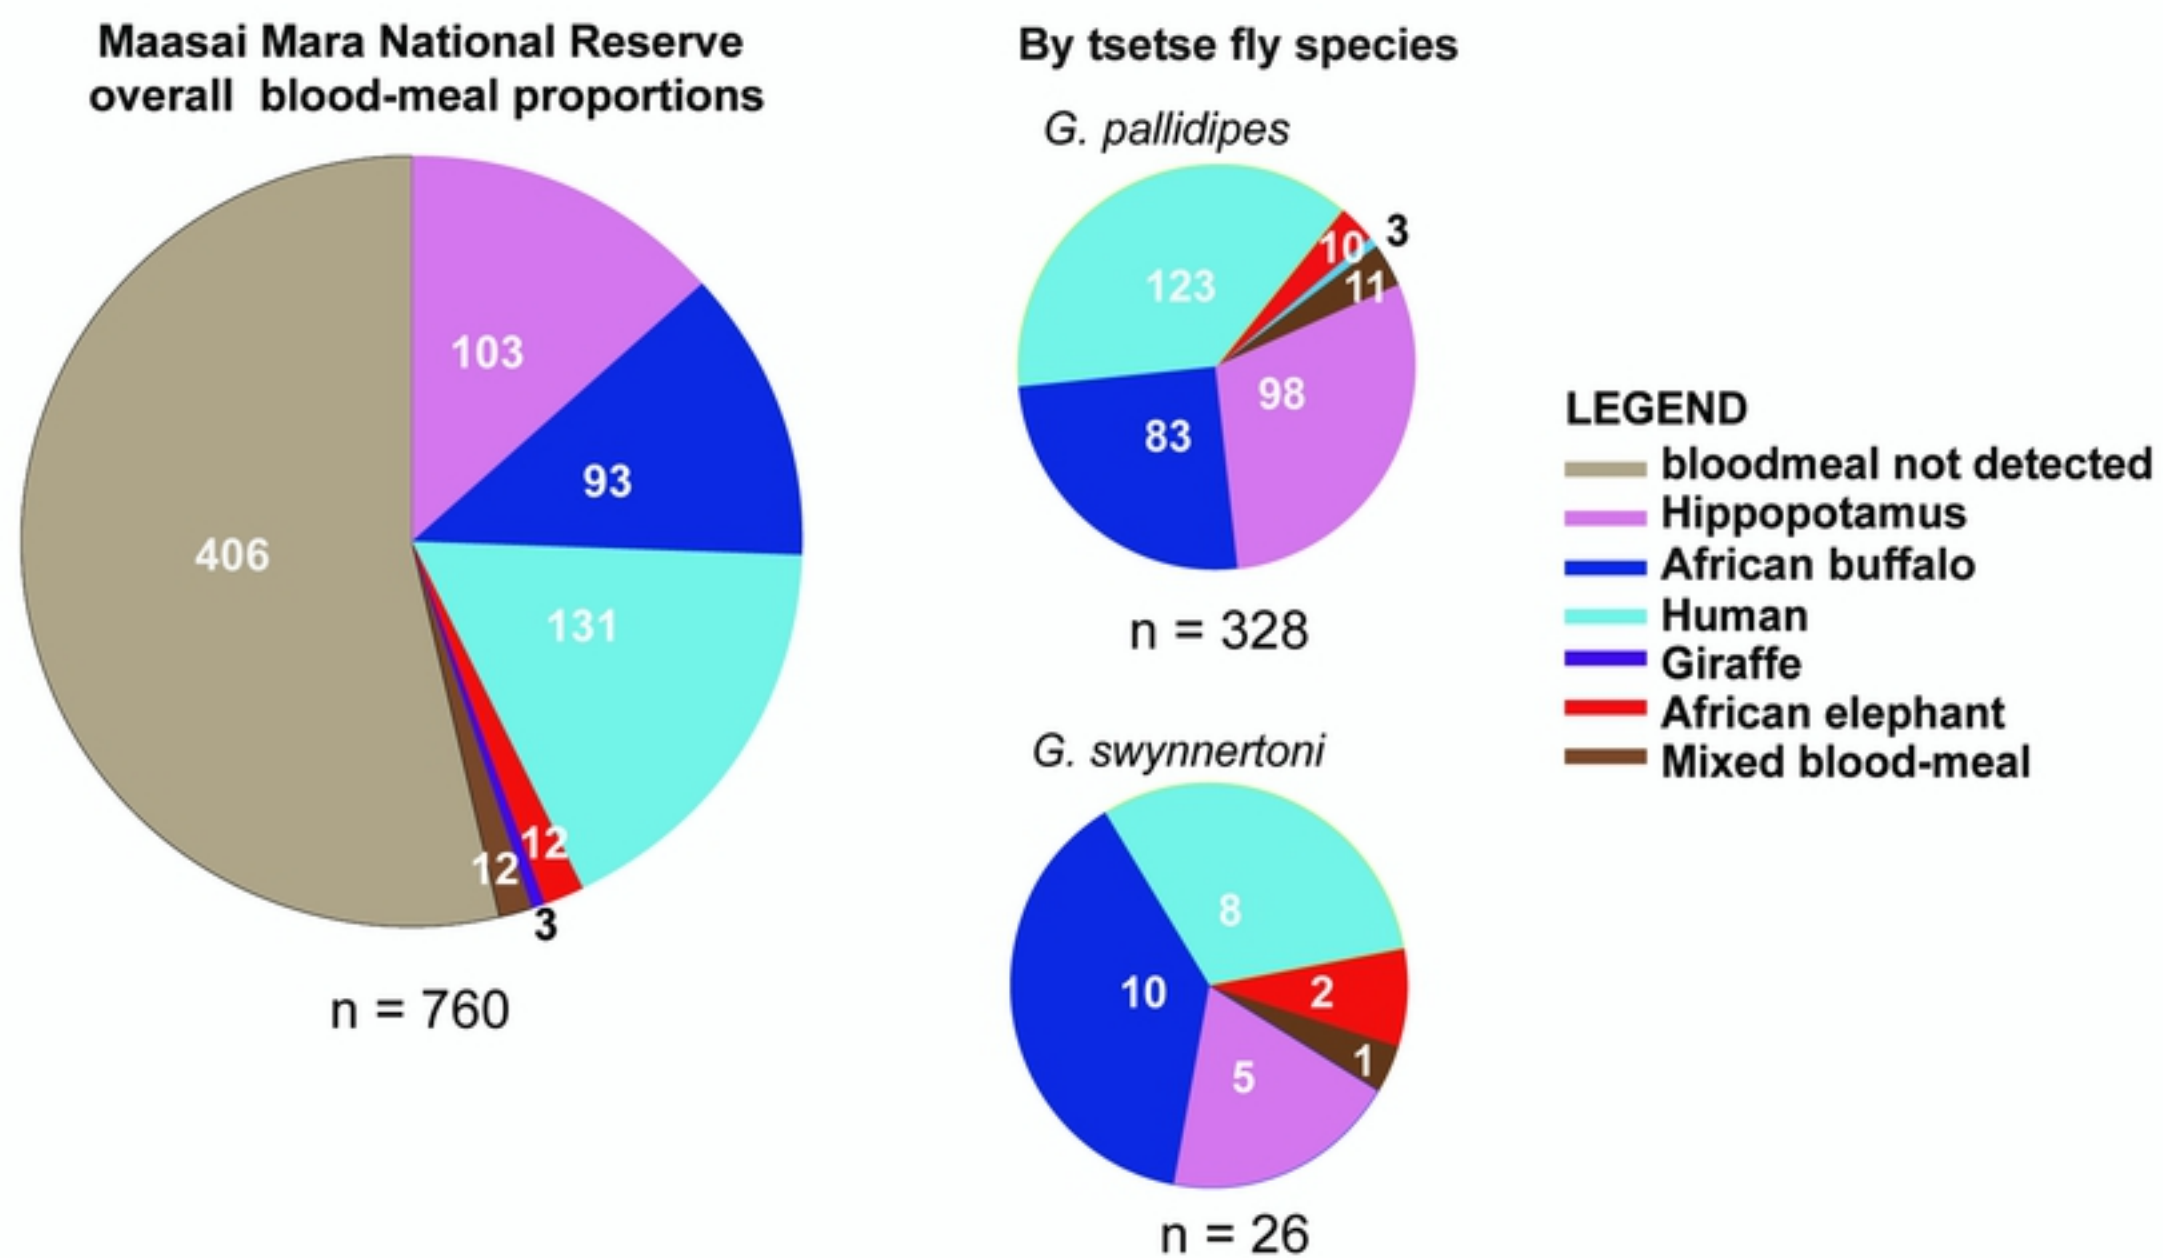

Fig 2
